# Supplementary material for: Gene interaction perturbation network deciphers a high-resolution taxonomy in colorectal cancer
Source: bioRxiv preprint, doi:10.1101/2022.09.02.506442, version 1 (2022-09-05)
Supplement: Supplementary File 10 [file 506442_file12.xlsx]

## Sheet: S10
Supplementary File 10. The proteome (Reverse Phase Protein Array) data available from the TCGA portal included only 26 immunomodulators.
Gene	Protein	Immunomodulator
B2M	B2M	TRUE
CCL20	CCL20	TRUE
CCL24	CCL24	TRUE
CD276	CD276	TRUE
CXCL14	CXCL14	TRUE
CXCL5	CXCL5	TRUE
ENTPD1	ENTPD1	TRUE
HLA-A	HLA-A	TRUE
HLA-B	HLA-B	TRUE
HLA-C	HLA-C	TRUE
HLA-DMB	HLA-DMB	TRUE
HLA-DPA1	HLA-DPA1	TRUE
HLA-DPB1	HLA-DPB1	TRUE
HLA-DQA1	HLA-DQA1	TRUE
HLA-DQB1	HLA-DQB1	TRUE
HLA-DRA	HLA-DRA	TRUE
HLA-DRB1	HLA-DRB1	TRUE
HLA-E	HLA-E	TRUE
HLA-F	HLA-F	TRUE
IDO1	IDO1	TRUE
LGALS9	LGALS9	TRUE
NT5E	NT5E	TRUE
PVR	PVR	TRUE
TAP1	TAP1	TRUE
TAP2	TAP2	TRUE
TAPBP	TAPBP	TRUE
A1BG	A1BG	FALSE
A1CF	A1CF	FALSE
A2M	A2M	FALSE
AAAS	AAAS	FALSE
AACS	AACS	FALSE
AAGAB	AAGAB	FALSE
AAK1	AAK1	FALSE
AAMDC	AAMDC	FALSE
AAMP	AAMP	FALSE
AAR2	AAR2	FALSE
AARD	AARD	FALSE
AARS	AARS	FALSE
AARS2	AARS2	FALSE
AARSD1	AARSD1	FALSE
AASDHPPT	AASDHPPT	FALSE
AATF	AATF	FALSE
ABAT	ABAT	FALSE
ABCB1	ABCB1	FALSE
ABCB10	ABCB10	FALSE
ABCB6	ABCB6	FALSE
ABCB7	ABCB7	FALSE
ABCB8	ABCB8	FALSE
ABCC1	ABCC1	FALSE
ABCC10	ABCC10	FALSE
ABCC3	ABCC3	FALSE
ABCC4	ABCC4	FALSE
ABCD1	ABCD1	FALSE
ABCD3	ABCD3	FALSE
ABCE1	ABCE1	FALSE
ABCF1	ABCF1	FALSE
ABCF2	ABCF2	FALSE
ABCF3	ABCF3	FALSE
ABHD10	ABHD10	FALSE
ABHD11	ABHD11	FALSE
ABHD12	ABHD12	FALSE
ABHD14B	ABHD14B	FALSE
ABHD16A	ABHD16A	FALSE
ABHD6	ABHD6	FALSE
ABI1	ABI1	FALSE
ABI3BP	ABI3BP	FALSE
ABLIM1	ABLIM1	FALSE
ABR	ABR	FALSE
ABRACL	ABRACL	FALSE
ACAA1	ACAA1	FALSE
ACAA2	ACAA2	FALSE
ACACA	ACACA	FALSE
ACAD10	ACAD10	FALSE
ACAD8	ACAD8	FALSE
ACAD9	ACAD9	FALSE
ACADM	ACADM	FALSE
ACADS	ACADS	FALSE
ACADSB	ACADSB	FALSE
ACADVL	ACADVL	FALSE
ACAN	ACAN	FALSE
ACAP2	ACAP2	FALSE
ACAT1	ACAT1	FALSE
ACAT2	ACAT2	FALSE
ACBD3	ACBD3	FALSE
ACBD5	ACBD5	FALSE
ACE	ACE	FALSE
ACE2	ACE2	FALSE
ACIN1	ACIN1	FALSE
ACLY	ACLY	FALSE
ACO1	ACO1	FALSE
ACO2	ACO2	FALSE
ACOT1	ACOT1	FALSE
ACOT11	ACOT11	FALSE
ACOT13	ACOT13	FALSE
ACOT7	ACOT7	FALSE
ACOT8	ACOT8	FALSE
ACOT9	ACOT9	FALSE
ACOX1	ACOX1	FALSE
ACOX2	ACOX2	FALSE
ACOX3	ACOX3	FALSE
ACP1	ACP1	FALSE
ACP2	ACP2	FALSE
ACP5	ACP5	FALSE
ACP6	ACP6	FALSE
ACSF2	ACSF2	FALSE
ACSF3	ACSF3	FALSE
ACSL1	ACSL1	FALSE
ACSL3	ACSL3	FALSE
ACSL4	ACSL4	FALSE
ACSL5	ACSL5	FALSE
ACSM3	ACSM3	FALSE
ACSS1	ACSS1	FALSE
ACSS2	ACSS2	FALSE
ACSS3	ACSS3	FALSE
ACTA2	ACTA2	FALSE
ACTB	ACTB	FALSE
ACTBL2	ACTBL2	FALSE
ACTG2	ACTG2	FALSE
ACTL6A	ACTL6A	FALSE
ACTN1	ACTN1	FALSE
ACTN4	ACTN4	FALSE
ACTR10	ACTR10	FALSE
ACTR1A	ACTR1A	FALSE
ACTR1B	ACTR1B	FALSE
ACTR2	ACTR2	FALSE
ACTR3	ACTR3	FALSE
ACY1	ACY1	FALSE
ACYP1	ACYP1	FALSE
ADA	ADA	FALSE
ADAM10	ADAM10	FALSE
ADAM15	ADAM15	FALSE
ADAM19	ADAM19	FALSE
ADAM9	ADAM9	FALSE
ADAMDEC1	ADAMDEC1	FALSE
ADAR	ADAR	FALSE
ADCK1	ADCK1	FALSE
ADCK3	ADCK3	FALSE
ADCK4	ADCK4	FALSE
ADCK5	ADCK5	FALSE
ADD1	ADD1	FALSE
ADD3	ADD3	FALSE
ADH1B	ADH1B	FALSE
ADH1C	ADH1C	FALSE
ADH5	ADH5	FALSE
ADH6	ADH6	FALSE
ADI1	ADI1	FALSE
ADIRF	ADIRF	FALSE
ADK	ADK	FALSE
ADNP	ADNP	FALSE
ADPGK	ADPGK	FALSE
ADPRH	ADPRH	FALSE
ADPRHL2	ADPRHL2	FALSE
ADRBK1	ADRBK1	FALSE
ADRM1	ADRM1	FALSE
ADSL	ADSL	FALSE
ADSS	ADSS	FALSE
AEBP1	AEBP1	FALSE
AFAP1	AFAP1	FALSE
AFAP1L2	AFAP1L2	FALSE
AFF3	AFF3	FALSE
AFG3L2	AFG3L2	FALSE
AFM	AFM	FALSE
AFTPH	AFTPH	FALSE
AGA	AGA	FALSE
AGAP1	AGAP1	FALSE
AGAP2	AGAP2	FALSE
AGFG1	AGFG1	FALSE
AGFG2	AGFG2	FALSE
AGK	AGK	FALSE
AGL	AGL	FALSE
AGMAT	AGMAT	FALSE
AGO1	AGO1	FALSE
AGO2	AGO2	FALSE
AGO3	AGO3	FALSE
AGPAT1	AGPAT1	FALSE
AGPAT2	AGPAT2	FALSE
AGPAT3	AGPAT3	FALSE
AGPAT5	AGPAT5	FALSE
AGPS	AGPS	FALSE
AGR2	AGR2	FALSE
AGR3	AGR3	FALSE
AGRN	AGRN	FALSE
AGT	AGT	FALSE
AHCTF1	AHCTF1	FALSE
AHCY	AHCY	FALSE
AHCYL1	AHCYL1	FALSE
AHCYL2	AHCYL2	FALSE
AHNAK	AHNAK	FALSE
AHNAK2	AHNAK2	FALSE
AHSA1	AHSA1	FALSE
AHSG	AHSG	FALSE
AIDA	AIDA	FALSE
AIF1	AIF1	FALSE
AIFM1	AIFM1	FALSE
AIFM2	AIFM2	FALSE
AIM1	AIM1	FALSE
AIMP1	AIMP1	FALSE
AIMP2	AIMP2	FALSE
AIP	AIP	FALSE
AK1	AK1	FALSE
AK2	AK2	FALSE
AK3	AK3	FALSE
AK4	AK4	FALSE
AKAP1	AKAP1	FALSE
AKAP12	AKAP12	FALSE
AKAP13	AKAP13	FALSE
AKAP2	AKAP2	FALSE
AKAP8	AKAP8	FALSE
AKAP8L	AKAP8L	FALSE
AKAP9	AKAP9	FALSE
AKR1A1	AKR1A1	FALSE
AKR1B1	AKR1B1	FALSE
AKR1B10	AKR1B10	FALSE
AKR1C1	AKR1C1	FALSE
AKR1C3	AKR1C3	FALSE
AKR1C4	AKR1C4	FALSE
AKR7A2	AKR7A2	FALSE
AKR7A3	AKR7A3	FALSE
ALAD	ALAD	FALSE
ALB	ALB	FALSE
ALCAM	ALCAM	FALSE
ALDH16A1	ALDH16A1	FALSE
ALDH18A1	ALDH18A1	FALSE
ALDH1A1	ALDH1A1	FALSE
ALDH1A2	ALDH1A2	FALSE
ALDH1A3	ALDH1A3	FALSE
ALDH1B1	ALDH1B1	FALSE
ALDH1L1	ALDH1L1	FALSE
ALDH1L2	ALDH1L2	FALSE
ALDH2	ALDH2	FALSE
ALDH3A1	ALDH3A1	FALSE
ALDH3A2	ALDH3A2	FALSE
ALDH3B1	ALDH3B1	FALSE
ALDH4A1	ALDH4A1	FALSE
ALDH5A1	ALDH5A1	FALSE
ALDH6A1	ALDH6A1	FALSE
ALDH7A1	ALDH7A1	FALSE
ALDH9A1	ALDH9A1	FALSE
ALDOA	ALDOA	FALSE
ALDOB	ALDOB	FALSE
ALDOC	ALDOC	FALSE
ALG1	ALG1	FALSE
ALG11	ALG11	FALSE
ALG12	ALG12	FALSE
ALG2	ALG2	FALSE
ALG3	ALG3	FALSE
ALG5	ALG5	FALSE
ALG8	ALG8	FALSE
ALK	ALK	FALSE
ALOX15	ALOX15	FALSE
ALOX5	ALOX5	FALSE
ALPK1	ALPK1	FALSE
ALPK3	ALPK3	FALSE
ALYREF	ALYREF	FALSE
AMACR	AMACR	FALSE
AMBP	AMBP	FALSE
AMDHD2	AMDHD2	FALSE
AMOT	AMOT	FALSE
AMPD2	AMPD2	FALSE
AMPD3	AMPD3	FALSE
AMT	AMT	FALSE
ANAPC1	ANAPC1	FALSE
ANAPC4	ANAPC4	FALSE
ANAPC7	ANAPC7	FALSE
ANG	ANG	FALSE
ANGPTL2	ANGPTL2	FALSE
ANK1	ANK1	FALSE
ANK2	ANK2	FALSE
ANK3	ANK3	FALSE
ANKFY1	ANKFY1	FALSE
ANKHD1	ANKHD1	FALSE
ANKRD12	ANKRD12	FALSE
ANKRD13A	ANKRD13A	FALSE
ANKRD17	ANKRD17	FALSE
ANKRD22	ANKRD22	FALSE
ANKRD28	ANKRD28	FALSE
ANKRD44	ANKRD44	FALSE
ANKS1A	ANKS1A	FALSE
ANKS4B	ANKS4B	FALSE
ANKZF1	ANKZF1	FALSE
ANO10	ANO10	FALSE
ANO6	ANO6	FALSE
ANP32A	ANP32A	FALSE
ANP32B	ANP32B	FALSE
ANP32E	ANP32E	FALSE
ANPEP	ANPEP	FALSE
ANTXR1	ANTXR1	FALSE
ANXA1	ANXA1	FALSE
ANXA10	ANXA10	FALSE
ANXA11	ANXA11	FALSE
ANXA13	ANXA13	FALSE
ANXA2	ANXA2	FALSE
ANXA3	ANXA3	FALSE
ANXA4	ANXA4	FALSE
ANXA5	ANXA5	FALSE
ANXA6	ANXA6	FALSE
ANXA7	ANXA7	FALSE
AOC1	AOC1	FALSE
AOC3	AOC3	FALSE
AP1B1	AP1B1	FALSE
AP1G1	AP1G1	FALSE
AP1G2	AP1G2	FALSE
AP1M1	AP1M1	FALSE
AP1M2	AP1M2	FALSE
AP1S1	AP1S1	FALSE
AP2A1	AP2A1	FALSE
AP2A2	AP2A2	FALSE
AP2B1	AP2B1	FALSE
AP2M1	AP2M1	FALSE
AP2S1	AP2S1	FALSE
AP3B1	AP3B1	FALSE
AP3D1	AP3D1	FALSE
AP3M1	AP3M1	FALSE
AP3S1	AP3S1	FALSE
AP4E1	AP4E1	FALSE
APAF1	APAF1	FALSE
APBB1IP	APBB1IP	FALSE
APCS	APCS	FALSE
APEH	APEH	FALSE
APEX1	APEX1	FALSE
API5	API5	FALSE
APIP	APIP	FALSE
APLP2	APLP2	FALSE
APMAP	APMAP	FALSE
APOA1	APOA1	FALSE
APOA1BP	APOA1BP	FALSE
APOA2	APOA2	FALSE
APOA4	APOA4	FALSE
APOB	APOB	FALSE
APOBEC3C	APOBEC3C	FALSE
APOBR	APOBR	FALSE
APOC1	APOC1	FALSE
APOC2	APOC2	FALSE
APOC3	APOC3	FALSE
APOD	APOD	FALSE
APOE	APOE	FALSE
APOH	APOH	FALSE
APOL1	APOL1	FALSE
APOL2	APOL2	FALSE
APOL3	APOL3	FALSE
APOO	APOO	FALSE
APOOL	APOOL	FALSE
APP	APP	FALSE
APPL1	APPL1	FALSE
APPL2	APPL2	FALSE
APRT	APRT	FALSE
APTX	APTX	FALSE
ARAF	ARAF	FALSE
ARAP1	ARAP1	FALSE
ARCN1	ARCN1	FALSE
ARF3	ARF3	FALSE
ARF4	ARF4	FALSE
ARF5	ARF5	FALSE
ARF6	ARF6	FALSE
ARFGAP1	ARFGAP1	FALSE
ARFGAP2	ARFGAP2	FALSE
ARFGAP3	ARFGAP3	FALSE
ARFGEF1	ARFGEF1	FALSE
ARFGEF2	ARFGEF2	FALSE
ARFIP1	ARFIP1	FALSE
ARFIP2	ARFIP2	FALSE
ARFRP1	ARFRP1	FALSE
ARG1	ARG1	FALSE
ARHGAP1	ARHGAP1	FALSE
ARHGAP17	ARHGAP17	FALSE
ARHGAP18	ARHGAP18	FALSE
ARHGAP25	ARHGAP25	FALSE
ARHGAP27	ARHGAP27	FALSE
ARHGAP35	ARHGAP35	FALSE
ARHGAP4	ARHGAP4	FALSE
ARHGAP5	ARHGAP5	FALSE
ARHGDIA	ARHGDIA	FALSE
ARHGDIB	ARHGDIB	FALSE
ARHGEF1	ARHGEF1	FALSE
ARHGEF10L	ARHGEF10L	FALSE
ARHGEF11	ARHGEF11	FALSE
ARHGEF12	ARHGEF12	FALSE
ARHGEF16	ARHGEF16	FALSE
ARHGEF17	ARHGEF17	FALSE
ARHGEF18	ARHGEF18	FALSE
ARHGEF2	ARHGEF2	FALSE
ARHGEF40	ARHGEF40	FALSE
ARHGEF5	ARHGEF5	FALSE
ARHGEF6	ARHGEF6	FALSE
ARHGEF7	ARHGEF7	FALSE
ARID1A	ARID1A	FALSE
ARID1B	ARID1B	FALSE
ARID2	ARID2	FALSE
ARID3A	ARID3A	FALSE
ARIH1	ARIH1	FALSE
ARL1	ARL1	FALSE
ARL15	ARL15	FALSE
ARL2	ARL2	FALSE
ARL3	ARL3	FALSE
ARL6IP1	ARL6IP1	FALSE
ARL6IP4	ARL6IP4	FALSE
ARL6IP5	ARL6IP5	FALSE
ARL8A	ARL8A	FALSE
ARL8B	ARL8B	FALSE
ARMC1	ARMC1	FALSE
ARMC10	ARMC10	FALSE
ARMC6	ARMC6	FALSE
ARMC8	ARMC8	FALSE
ARMC9	ARMC9	FALSE
ARMCX3	ARMCX3	FALSE
ARPC1A	ARPC1A	FALSE
ARPC1B	ARPC1B	FALSE
ARPC2	ARPC2	FALSE
ARPC3	ARPC3	FALSE
ARPC4	ARPC4	FALSE
ARPC5	ARPC5	FALSE
ARPC5L	ARPC5L	FALSE
ARRB1	ARRB1	FALSE
ARRB2	ARRB2	FALSE
ARRDC1	ARRDC1	FALSE
ARSA	ARSA	FALSE
ARSB	ARSB	FALSE
ARSE	ARSE	FALSE
ASAH1	ASAH1	FALSE
ASAP2	ASAP2	FALSE
ASB9	ASB9	FALSE
ASCC2	ASCC2	FALSE
ASCC3	ASCC3	FALSE
ASH2L	ASH2L	FALSE
ASL	ASL	FALSE
ASMTL	ASMTL	FALSE
ASNA1	ASNA1	FALSE
ASNS	ASNS	FALSE
ASPH	ASPH	FALSE
ASPM	ASPM	FALSE
ASPN	ASPN	FALSE
ASPSCR1	ASPSCR1	FALSE
ASRGL1	ASRGL1	FALSE
ASS1	ASS1	FALSE
ASUN	ASUN	FALSE
ATAD1	ATAD1	FALSE
ATAD2	ATAD2	FALSE
ATAD3A	ATAD3A	FALSE
ATAD3B	ATAD3B	FALSE
ATE1	ATE1	FALSE
ATG16L1	ATG16L1	FALSE
ATG3	ATG3	FALSE
ATG4B	ATG4B	FALSE
ATG5	ATG5	FALSE
ATG7	ATG7	FALSE
ATG9A	ATG9A	FALSE
ATIC	ATIC	FALSE
ATL2	ATL2	FALSE
ATL3	ATL3	FALSE
ATM	ATM	FALSE
ATOX1	ATOX1	FALSE
ATP13A1	ATP13A1	FALSE
ATP1A1	ATP1A1	FALSE
ATP1A2	ATP1A2	FALSE
ATP1B1	ATP1B1	FALSE
ATP1B3	ATP1B3	FALSE
ATP2A2	ATP2A2	FALSE
ATP2A3	ATP2A3	FALSE
ATP2B1	ATP2B1	FALSE
ATP2B4	ATP2B4	FALSE
ATP2C1	ATP2C1	FALSE
ATP5A1	ATP5A1	FALSE
ATP5B	ATP5B	FALSE
ATP5C1	ATP5C1	FALSE
ATP5D	ATP5D	FALSE
ATP5E	ATP5E	FALSE
ATP5F1	ATP5F1	FALSE
ATP5H	ATP5H	FALSE
ATP5I	ATP5I	FALSE
ATP5J	ATP5J	FALSE
ATP5J2-PTCD1	ATP5J2-PTCD1	FALSE
ATP5L	ATP5L	FALSE
ATP5O	ATP5O	FALSE
ATP5S	ATP5S	FALSE
ATP6	ATP6	FALSE
ATP6AP1	ATP6AP1	FALSE
ATP6AP2	ATP6AP2	FALSE
ATP6V0A1	ATP6V0A1	FALSE
ATP6V0A2	ATP6V0A2	FALSE
ATP6V0D1	ATP6V0D1	FALSE
ATP6V1A	ATP6V1A	FALSE
ATP6V1B2	ATP6V1B2	FALSE
ATP6V1C1	ATP6V1C1	FALSE
ATP6V1D	ATP6V1D	FALSE
ATP6V1E1	ATP6V1E1	FALSE
ATP6V1F	ATP6V1F	FALSE
ATP6V1G1	ATP6V1G1	FALSE
ATP6V1H	ATP6V1H	FALSE
ATP8B1	ATP8B1	FALSE
ATP9A	ATP9A	FALSE
ATPAF1	ATPAF1	FALSE
ATPAF2	ATPAF2	FALSE
ATPIF1	ATPIF1	FALSE
ATRN	ATRN	FALSE
ATRX	ATRX	FALSE
ATXN10	ATXN10	FALSE
ATXN2	ATXN2	FALSE
ATXN2L	ATXN2L	FALSE
ATXN3	ATXN3	FALSE
AUH	AUH	FALSE
AUP1	AUP1	FALSE
AURKA	AURKA	FALSE
AURKB	AURKB	FALSE
AVEN	AVEN	FALSE
AVL9	AVL9	FALSE
AZGP1	AZGP1	FALSE
AZU1	AZU1	FALSE
B3GALT5	B3GALT5	FALSE
B3GAT3	B3GAT3	FALSE
B3GNT2	B3GNT2	FALSE
B3GNT3	B3GNT3	FALSE
B3GNT6	B3GNT6	FALSE
B3GNT7	B3GNT7	FALSE
B4GALT1	B4GALT1	FALSE
B4GALT4	B4GALT4	FALSE
BABAM1	BABAM1	FALSE
BAG1	BAG1	FALSE
BAG2	BAG2	FALSE
BAG3	BAG3	FALSE
BAG5	BAG5	FALSE
BAG6	BAG6	FALSE
BAIAP2	BAIAP2	FALSE
BAIAP2L1	BAIAP2L1	FALSE
BAIAP2L2	BAIAP2L2	FALSE
BAK1	BAK1	FALSE
BANF1	BANF1	FALSE
BASP1	BASP1	FALSE
BAX	BAX	FALSE
BAZ1A	BAZ1A	FALSE
BAZ1B	BAZ1B	FALSE
BCAM	BCAM	FALSE
BCAP31	BCAP31	FALSE
BCAR1	BCAR1	FALSE
BCAS1	BCAS1	FALSE
BCAS2	BCAS2	FALSE
BCAT1	BCAT1	FALSE
BCAT2	BCAT2	FALSE
BCCIP	BCCIP	FALSE
BCKDHA	BCKDHA	FALSE
BCKDHB	BCKDHB	FALSE
BCKDK	BCKDK	FALSE
BCL10	BCL10	FALSE
BCL2L13	BCL2L13	FALSE
BCL2L15	BCL2L15	FALSE
BCL2L2	BCL2L2	FALSE
BCLAF1	BCLAF1	FALSE
BCR	BCR	FALSE
BCS1L	BCS1L	FALSE
BDH1	BDH1	FALSE
BDH2	BDH2	FALSE
BET1L	BET1L	FALSE
BGN	BGN	FALSE
BID	BID	FALSE
BIN1	BIN1	FALSE
BIN2	BIN2	FALSE
BIRC6	BIRC6	FALSE
BLMH	BLMH	FALSE
BLOC1S1	BLOC1S1	FALSE
BLOC1S3	BLOC1S3	FALSE
BLOC1S4	BLOC1S4	FALSE
BLOC1S5	BLOC1S5	FALSE
BLVRA	BLVRA	FALSE
BLVRB	BLVRB	FALSE
BMP2K	BMP2K	FALSE
BMS1	BMS1	FALSE
BNIP1	BNIP1	FALSE
BOD1L1	BOD1L1	FALSE
BOLA2	BOLA2	FALSE
BOP1	BOP1	FALSE
BPGM	BPGM	FALSE
BPHL	BPHL	FALSE
BPI	BPI	FALSE
BPNT1	BPNT1	FALSE
BPTF	BPTF	FALSE
BRAP	BRAP	FALSE
BRAT1	BRAT1	FALSE
BRCC3	BRCC3	FALSE
BRD1	BRD1	FALSE
BRD2	BRD2	FALSE
BRD3	BRD3	FALSE
BRD4	BRD4	FALSE
BRE	BRE	FALSE
BRI3BP	BRI3BP	FALSE
BRIX1	BRIX1	FALSE
BRK1	BRK1	FALSE
BROX	BROX	FALSE
BSDC1	BSDC1	FALSE
BSG	BSG	FALSE
BSPRY	BSPRY	FALSE
BST1	BST1	FALSE
BTAF1	BTAF1	FALSE
BTD	BTD	FALSE
BTF3	BTF3	FALSE
BTK	BTK	FALSE
BTN3A3	BTN3A3	FALSE
BUB3	BUB3	FALSE
BUD31	BUD31	FALSE
BYSL	BYSL	FALSE
BZW1	BZW1	FALSE
BZW2	BZW2	FALSE
C10orf120	C10orf120	FALSE
C10orf76	C10orf76	FALSE
C11orf30	C11orf30	FALSE
C11orf31	C11orf31	FALSE
C11orf54	C11orf54	FALSE
C11orf58	C11orf58	FALSE
C11orf68	C11orf68	FALSE
C11orf73	C11orf73	FALSE
C12orf10	C12orf10	FALSE
C12orf5	C12orf5	FALSE
C14orf159	C14orf159	FALSE
C14orf166	C14orf166	FALSE
C14orf169	C14orf169	FALSE
C15orf38	C15orf38	FALSE
C15orf48	C15orf48	FALSE
C16orf13	C16orf13	FALSE
C16orf58	C16orf58	FALSE
C16orf62	C16orf62	FALSE
C16orf80	C16orf80	FALSE
C17orf49	C17orf49	FALSE
C17orf75	C17orf75	FALSE
C17orf85	C17orf85	FALSE
C17orf89	C17orf89	FALSE
C18orf8	C18orf8	FALSE
C19orf10	C19orf10	FALSE
C19orf12	C19orf12	FALSE
C19orf43	C19orf43	FALSE
C19orf52	C19orf52	FALSE
C19orf66	C19orf66	FALSE
C19orf70	C19orf70	FALSE
C1GALT1	C1GALT1	FALSE
C1QA	C1QA	FALSE
C1QB	C1QB	FALSE
C1QBP	C1QBP	FALSE
C1QC	C1QC	FALSE
C1QTNF5	C1QTNF5	FALSE
C1R	C1R	FALSE
C1S	C1S	FALSE
C1orf116	C1orf116	FALSE
C1orf122	C1orf122	FALSE
C1orf123	C1orf123	FALSE
C1orf198	C1orf198	FALSE
C1orf27	C1orf27	FALSE
C1orf35	C1orf35	FALSE
C20orf27	C20orf27	FALSE
C21orf33	C21orf33	FALSE
C2CD2	C2CD2	FALSE
C2CD5	C2CD5	FALSE
C2orf43	C2orf43	FALSE
C2orf47	C2orf47	FALSE
C2orf72	C2orf72	FALSE
C3	C3	FALSE
C3orf17	C3orf17	FALSE
C4B	C4B	FALSE
C4BPA	C4BPA	FALSE
C4BPB	C4BPB	FALSE
C4orf27	C4orf27	FALSE
C5	C5	FALSE
C5orf51	C5orf51	FALSE
C6	C6	FALSE
C6orf203	C6orf203	FALSE
C6orf211	C6orf211	FALSE
C7	C7	FALSE
C7orf26	C7orf26	FALSE
C7orf50	C7orf50	FALSE
C7orf55-LUC7L2	C7orf55-LUC7L2	FALSE
C8A	C8A	FALSE
C8B	C8B	FALSE
C8G	C8G	FALSE
C8orf33	C8orf33	FALSE
C8orf82	C8orf82	FALSE
C9	C9	FALSE
C9orf114	C9orf114	FALSE
C9orf142	C9orf142	FALSE
C9orf41	C9orf41	FALSE
C9orf64	C9orf64	FALSE
C9orf78	C9orf78	FALSE
C9orf89	C9orf89	FALSE
CA1	CA1	FALSE
CA12	CA12	FALSE
CA13	CA13	FALSE
CA2	CA2	FALSE
CA4	CA4	FALSE
CA8	CA8	FALSE
CA9	CA9	FALSE
CAB39	CAB39	FALSE
CAB39L	CAB39L	FALSE
CACNA2D1	CACNA2D1	FALSE
CACYBP	CACYBP	FALSE
CAD	CAD	FALSE
CADPS	CADPS	FALSE
CALB2	CALB2	FALSE
CALCOCO2	CALCOCO2	FALSE
CALD1	CALD1	FALSE
CALM2	CALM2	FALSE
CALML4	CALML4	FALSE
CALR	CALR	FALSE
CALU	CALU	FALSE
CAMK1	CAMK1	FALSE
CAMK1D	CAMK1D	FALSE
CAMK2D	CAMK2D	FALSE
CAMK2G	CAMK2G	FALSE
CAMP	CAMP	FALSE
CAMSAP3	CAMSAP3	FALSE
CAND1	CAND1	FALSE
CANT1	CANT1	FALSE
CANX	CANX	FALSE
CAP1	CAP1	FALSE
CAP2	CAP2	FALSE
CAPG	CAPG	FALSE
CAPN1	CAPN1	FALSE
CAPN2	CAPN2	FALSE
CAPN5	CAPN5	FALSE
CAPN6	CAPN6	FALSE
CAPN7	CAPN7	FALSE
CAPN9	CAPN9	FALSE
CAPNS1	CAPNS1	FALSE
CAPRIN1	CAPRIN1	FALSE
CAPS	CAPS	FALSE
CAPZA1	CAPZA1	FALSE
CAPZA2	CAPZA2	FALSE
CAPZB	CAPZB	FALSE
CARHSP1	CARHSP1	FALSE
CARKD	CARKD	FALSE
CARM1	CARM1	FALSE
CARS	CARS	FALSE
CARS2	CARS2	FALSE
CASC4	CASC4	FALSE
CASK	CASK	FALSE
CASP1	CASP1	FALSE
CASP10	CASP10	FALSE
CASP3	CASP3	FALSE
CASP4	CASP4	FALSE
CASP6	CASP6	FALSE
CASP7	CASP7	FALSE
CASP8	CASP8	FALSE
CAST	CAST	FALSE
CAT	CAT	FALSE
CAV1	CAV1	FALSE
CAV2	CAV2	FALSE
CBFB	CBFB	FALSE
CBL	CBL	FALSE
CBR1	CBR1	FALSE
CBR3	CBR3	FALSE
CBR4	CBR4	FALSE
CBWD1	CBWD1	FALSE
CBX3	CBX3	FALSE
CBX5	CBX5	FALSE
CBX8	CBX8	FALSE
CC2D1A	CC2D1A	FALSE
CC2D1B	CC2D1B	FALSE
CCAR1	CCAR1	FALSE
CCAR2	CCAR2	FALSE
CCBL2	CCBL2	FALSE
CCDC12	CCDC12	FALSE
CCDC124	CCDC124	FALSE
CCDC127	CCDC127	FALSE
CCDC132	CCDC132	FALSE
CCDC134	CCDC134	FALSE
CCDC137	CCDC137	FALSE
CCDC22	CCDC22	FALSE
CCDC25	CCDC25	FALSE
CCDC43	CCDC43	FALSE
CCDC47	CCDC47	FALSE
CCDC50	CCDC50	FALSE
CCDC51	CCDC51	FALSE
CCDC53	CCDC53	FALSE
CCDC58	CCDC58	FALSE
CCDC6	CCDC6	FALSE
CCDC80	CCDC80	FALSE
CCDC85C	CCDC85C	FALSE
CCDC86	CCDC86	FALSE
CCDC88B	CCDC88B	FALSE
CCDC93	CCDC93	FALSE
CCM2	CCM2	FALSE
CCNB1	CCNB1	FALSE
CCNK	CCNK	FALSE
CCS	CCS	FALSE
CCT2	CCT2	FALSE
CCT3	CCT3	FALSE
CCT4	CCT4	FALSE
CCT5	CCT5	FALSE
CCT6A	CCT6A	FALSE
CCT7	CCT7	FALSE
CCT8	CCT8	FALSE
CCZ1B	CCZ1B	FALSE
CD109	CD109	FALSE
CD14	CD14	FALSE
CD151	CD151	FALSE
CD163	CD163	FALSE
CD209	CD209	FALSE
CD248	CD248	FALSE
CD2AP	CD2AP	FALSE
CD2BP2	CD2BP2	FALSE
CD36	CD36	FALSE
CD38	CD38	FALSE
CD3EAP	CD3EAP	FALSE
CD44	CD44	FALSE
CD46	CD46	FALSE
CD47	CD47	FALSE
CD55	CD55	FALSE
CD59	CD59	FALSE
CD5L	CD5L	FALSE
CD63	CD63	FALSE
CD74	CD74	FALSE
CD81	CD81	FALSE
CD82	CD82	FALSE
CD9	CD9	FALSE
CD93	CD93	FALSE
CD97	CD97	FALSE
CDA	CDA	FALSE
CDC123	CDC123	FALSE
CDC16	CDC16	FALSE
CDC23	CDC23	FALSE
CDC27	CDC27	FALSE
CDC37	CDC37	FALSE
CDC40	CDC40	FALSE
CDC42	CDC42	FALSE
CDC42BPB	CDC42BPB	FALSE
CDC42BPG	CDC42BPG	FALSE
CDC42EP1	CDC42EP1	FALSE
CDC42EP4	CDC42EP4	FALSE
CDC5L	CDC5L	FALSE
CDC73	CDC73	FALSE
CDCP1	CDCP1	FALSE
CDH1	CDH1	FALSE
CDH11	CDH11	FALSE
CDH13	CDH13	FALSE
CDH17	CDH17	FALSE
CDH3	CDH3	FALSE
CDHR5	CDHR5	FALSE
CDIPT	CDIPT	FALSE
CDK1	CDK1	FALSE
CDK11A	CDK11A	FALSE
CDK12	CDK12	FALSE
CDK2	CDK2	FALSE
CDK2AP1	CDK2AP1	FALSE
CDK4	CDK4	FALSE
CDK5	CDK5	FALSE
CDK5RAP3	CDK5RAP3	FALSE
CDK6	CDK6	FALSE
CDK7	CDK7	FALSE
CDK9	CDK9	FALSE
CDKAL1	CDKAL1	FALSE
CDKN2A	CDKN2A	FALSE
CDKN2AIP	CDKN2AIP	FALSE
CDS2	CDS2	FALSE
CDV3	CDV3	FALSE
CDX2	CDX2	FALSE
CEACAM1	CEACAM1	FALSE
CEACAM5	CEACAM5	FALSE
CEACAM6	CEACAM6	FALSE
CEACAM7	CEACAM7	FALSE
CEACAM8	CEACAM8	FALSE
CEBPZ	CEBPZ	FALSE
CECR1	CECR1	FALSE
CECR5	CECR5	FALSE
CEL	CEL	FALSE
CELA3A	CELA3A	FALSE
CELF1	CELF1	FALSE
CELF2	CELF2	FALSE
CEMIP	CEMIP	FALSE
CENPB	CENPB	FALSE
CENPE	CENPE	FALSE
CENPV	CENPV	FALSE
CEP131	CEP131	FALSE
CEP170	CEP170	FALSE
CEP290	CEP290	FALSE
CEP63	CEP63	FALSE
CERS2	CERS2	FALSE
CERS6	CERS6	FALSE
CES1	CES1	FALSE
CES2	CES2	FALSE
CES3	CES3	FALSE
CETN2	CETN2	FALSE
CFB	CFB	FALSE
CFD	CFD	FALSE
CFDP1	CFDP1	FALSE
CFH	CFH	FALSE
CFHR2	CFHR2	FALSE
CFHR5	CFHR5	FALSE
CFI	CFI	FALSE
CFL1	CFL1	FALSE
CFL2	CFL2	FALSE
CFP	CFP	FALSE
CGN	CGN	FALSE
CGREF1	CGREF1	FALSE
CHAF1B	CHAF1B	FALSE
CHAMP1	CHAMP1	FALSE
CHCHD1	CHCHD1	FALSE
CHCHD2	CHCHD2	FALSE
CHCHD3	CHCHD3	FALSE
CHCHD4	CHCHD4	FALSE
CHCHD6	CHCHD6	FALSE
CHD4	CHD4	FALSE
CHD7	CHD7	FALSE
CHDH	CHDH	FALSE
CHEK2	CHEK2	FALSE
CHERP	CHERP	FALSE
CHGA	CHGA	FALSE
CHI3L1	CHI3L1	FALSE
CHID1	CHID1	FALSE
CHIT1	CHIT1	FALSE
CHL1	CHL1	FALSE
CHMP1A	CHMP1A	FALSE
CHMP1B	CHMP1B	FALSE
CHMP2A	CHMP2A	FALSE
CHMP2B	CHMP2B	FALSE
CHMP3	CHMP3	FALSE
CHMP4B	CHMP4B	FALSE
CHMP4C	CHMP4C	FALSE
CHMP5	CHMP5	FALSE
CHMP6	CHMP6	FALSE
CHMP7	CHMP7	FALSE
CHORDC1	CHORDC1	FALSE
CHP1	CHP1	FALSE
CHPF	CHPF	FALSE
CHST14	CHST14	FALSE
CHTF18	CHTF18	FALSE
CHTOP	CHTOP	FALSE
CHUK	CHUK	FALSE
CHURC1-FNTB	CHURC1-FNTB	FALSE
CIAO1	CIAO1	FALSE
CIAPIN1	CIAPIN1	FALSE
CIB1	CIB1	FALSE
CILP	CILP	FALSE
CIRBP	CIRBP	FALSE
CIRH1A	CIRH1A	FALSE
CISD1	CISD1	FALSE
CISD2	CISD2	FALSE
CISD3	CISD3	FALSE
CIZ1	CIZ1	FALSE
CKAP2	CKAP2	FALSE
CKAP4	CKAP4	FALSE
CKAP5	CKAP5	FALSE
CKB	CKB	FALSE
CKMT1A	CKMT1A	FALSE
CKMT2	CKMT2	FALSE
CLASP1	CLASP1	FALSE
CLASP2	CLASP2	FALSE
CLASRP	CLASRP	FALSE
CLC	CLC	FALSE
CLCA1	CLCA1	FALSE
CLCC1	CLCC1	FALSE
CLCN3	CLCN3	FALSE
CLDN3	CLDN3	FALSE
CLDN7	CLDN7	FALSE
CLEC11A	CLEC11A	FALSE
CLEC3B	CLEC3B	FALSE
CLIC1	CLIC1	FALSE
CLIC2	CLIC2	FALSE
CLIC3	CLIC3	FALSE
CLIC4	CLIC4	FALSE
CLIC5	CLIC5	FALSE
CLINT1	CLINT1	FALSE
CLIP1	CLIP1	FALSE
CLIP2	CLIP2	FALSE
CLMN	CLMN	FALSE
CLN5	CLN5	FALSE
CLNS1A	CLNS1A	FALSE
CLPB	CLPB	FALSE
CLPP	CLPP	FALSE
CLPTM1	CLPTM1	FALSE
CLPTM1L	CLPTM1L	FALSE
CLPX	CLPX	FALSE
CLSTN1	CLSTN1	FALSE
CLTA	CLTA	FALSE
CLTB	CLTB	FALSE
CLTC	CLTC	FALSE
CLU	CLU	FALSE
CLUH	CLUH	FALSE
CLYBL	CLYBL	FALSE
CMA1	CMA1	FALSE
CMAS	CMAS	FALSE
CMBL	CMBL	FALSE
CMPK1	CMPK1	FALSE
CMPK2	CMPK2	FALSE
CNBP	CNBP	FALSE
CNDP2	CNDP2	FALSE
CNN1	CNN1	FALSE
CNN2	CNN2	FALSE
CNN3	CNN3	FALSE
CNNM3	CNNM3	FALSE
CNNM4	CNNM4	FALSE
CNOT1	CNOT1	FALSE
CNOT10	CNOT10	FALSE
CNOT11	CNOT11	FALSE
CNOT2	CNOT2	FALSE
CNOT3	CNOT3	FALSE
CNOT7	CNOT7	FALSE
CNP	CNP	FALSE
CNPY2	CNPY2	FALSE
CNPY3	CNPY3	FALSE
CNPY4	CNPY4	FALSE
CNRIP1	CNRIP1	FALSE
COA3	COA3	FALSE
COA5	COA5	FALSE
COA6	COA6	FALSE
COASY	COASY	FALSE
COBLL1	COBLL1	FALSE
COG1	COG1	FALSE
COG2	COG2	FALSE
COG3	COG3	FALSE
COG4	COG4	FALSE
COG5	COG5	FALSE
COG6	COG6	FALSE
COG7	COG7	FALSE
COG8	COG8	FALSE
COIL	COIL	FALSE
COL10A1	COL10A1	FALSE
COL11A1	COL11A1	FALSE
COL12A1	COL12A1	FALSE
COL14A1	COL14A1	FALSE
COL15A1	COL15A1	FALSE
COL17A1	COL17A1	FALSE
COL18A1	COL18A1	FALSE
COL1A1	COL1A1	FALSE
COL1A2	COL1A2	FALSE
COL2A1	COL2A1	FALSE
COL3A1	COL3A1	FALSE
COL4A1	COL4A1	FALSE
COL4A2	COL4A2	FALSE
COL4A3BP	COL4A3BP	FALSE
COL5A1	COL5A1	FALSE
COL5A2	COL5A2	FALSE
COL6A1	COL6A1	FALSE
COL6A2	COL6A2	FALSE
COL6A3	COL6A3	FALSE
COL7A1	COL7A1	FALSE
COL8A1	COL8A1	FALSE
COLGALT1	COLGALT1	FALSE
COMMD2	COMMD2	FALSE
COMMD3	COMMD3	FALSE
COMMD4	COMMD4	FALSE
COMMD5	COMMD5	FALSE
COMMD6	COMMD6	FALSE
COMMD8	COMMD8	FALSE
COMMD9	COMMD9	FALSE
COMP	COMP	FALSE
COMT	COMT	FALSE
COMTD1	COMTD1	FALSE
COPA	COPA	FALSE
COPB1	COPB1	FALSE
COPB2	COPB2	FALSE
COPE	COPE	FALSE
COPG1	COPG1	FALSE
COPG2	COPG2	FALSE
COPS2	COPS2	FALSE
COPS3	COPS3	FALSE
COPS4	COPS4	FALSE
COPS5	COPS5	FALSE
COPS6	COPS6	FALSE
COPS7A	COPS7A	FALSE
COPS7B	COPS7B	FALSE
COPS8	COPS8	FALSE
COPZ1	COPZ1	FALSE
COQ5	COQ5	FALSE
COQ6	COQ6	FALSE
COQ7	COQ7	FALSE
COQ9	COQ9	FALSE
CORO1A	CORO1A	FALSE
CORO1B	CORO1B	FALSE
CORO1C	CORO1C	FALSE
CORO2A	CORO2A	FALSE
CORO7	CORO7	FALSE
COTL1	COTL1	FALSE
COX15	COX15	FALSE
COX2	COX2	FALSE
COX20	COX20	FALSE
COX4I1	COX4I1	FALSE
COX5A	COX5A	FALSE
COX5B	COX5B	FALSE
COX6B1	COX6B1	FALSE
COX6C	COX6C	FALSE
COX7A2	COX7A2	FALSE
COX7A2L	COX7A2L	FALSE
COX7C	COX7C	FALSE
CP	CP	FALSE
CPA3	CPA3	FALSE
CPB2	CPB2	FALSE
CPD	CPD	FALSE
CPE	CPE	FALSE
CPN2	CPN2	FALSE
CPNE1	CPNE1	FALSE
CPNE2	CPNE2	FALSE
CPNE3	CPNE3	FALSE
CPOX	CPOX	FALSE
CPPED1	CPPED1	FALSE
CPQ	CPQ	FALSE
CPS1	CPS1	FALSE
CPSF1	CPSF1	FALSE
CPSF2	CPSF2	FALSE
CPSF3	CPSF3	FALSE
CPSF3L	CPSF3L	FALSE
CPSF6	CPSF6	FALSE
CPSF7	CPSF7	FALSE
CPT1A	CPT1A	FALSE
CPT2	CPT2	FALSE
CPVL	CPVL	FALSE
CRABP1	CRABP1	FALSE
CRABP2	CRABP2	FALSE
CRAT	CRAT	FALSE
CRBN	CRBN	FALSE
CREB1	CREB1	FALSE
CREBBP	CREBBP	FALSE
CRELD1	CRELD1	FALSE
CRIP1	CRIP1	FALSE
CRIP2	CRIP2	FALSE
CRK	CRK	FALSE
CRKL	CRKL	FALSE
CRLF3	CRLF3	FALSE
CRMP1	CRMP1	FALSE
CRNKL1	CRNKL1	FALSE
CROT	CROT	FALSE
CRP	CRP	FALSE
CRTAP	CRTAP	FALSE
CRTC3	CRTC3	FALSE
CRYAB	CRYAB	FALSE
CRYL1	CRYL1	FALSE
CRYM	CRYM	FALSE
CRYZ	CRYZ	FALSE
CRYZL1	CRYZL1	FALSE
CS	CS	FALSE
CSDE1	CSDE1	FALSE
CSE1L	CSE1L	FALSE
CSK	CSK	FALSE
CSNK1A1	CSNK1A1	FALSE
CSNK2A1	CSNK2A1	FALSE
CSNK2A2	CSNK2A2	FALSE
CSNK2B	CSNK2B	FALSE
CSPG4	CSPG4	FALSE
CSRP1	CSRP1	FALSE
CSRP2	CSRP2	FALSE
CST3	CST3	FALSE
CSTB	CSTB	FALSE
CSTF1	CSTF1	FALSE
CSTF2T	CSTF2T	FALSE
CSTF3	CSTF3	FALSE
CTAGE5	CTAGE5	FALSE
CTBP1	CTBP1	FALSE
CTBP2	CTBP2	FALSE
CTCF	CTCF	FALSE
CTDP1	CTDP1	FALSE
CTDSP1	CTDSP1	FALSE
CTH	CTH	FALSE
CTHRC1	CTHRC1	FALSE
CTNNA1	CTNNA1	FALSE
CTNNA2	CTNNA2	FALSE
CTNNB1	CTNNB1	FALSE
CTNNBIP1	CTNNBIP1	FALSE
CTNNBL1	CTNNBL1	FALSE
CTNND1	CTNND1	FALSE
CTPS1	CTPS1	FALSE
CTPS2	CTPS2	FALSE
CTSA	CTSA	FALSE
CTSB	CTSB	FALSE
CTSC	CTSC	FALSE
CTSD	CTSD	FALSE
CTSG	CTSG	FALSE
CTSH	CTSH	FALSE
CTSL	CTSL	FALSE
CTSS	CTSS	FALSE
CTSZ	CTSZ	FALSE
CTTN	CTTN	FALSE
CTTNBP2NL	CTTNBP2NL	FALSE
CUL1	CUL1	FALSE
CUL2	CUL2	FALSE
CUL3	CUL3	FALSE
CUL4A	CUL4A	FALSE
CUL4B	CUL4B	FALSE
CUL5	CUL5	FALSE
CUTA	CUTA	FALSE
CUX1	CUX1	FALSE
CUX2	CUX2	FALSE
CWC22	CWC22	FALSE
CWC27	CWC27	FALSE
CWF19L1	CWF19L1	FALSE
CWF19L2	CWF19L2	FALSE
CXADR	CXADR	FALSE
CXorf38	CXorf38	FALSE
CYB5A	CYB5A	FALSE
CYB5B	CYB5B	FALSE
CYB5R1	CYB5R1	FALSE
CYB5R2	CYB5R2	FALSE
CYB5R3	CYB5R3	FALSE
CYB5R4	CYB5R4	FALSE
CYBA	CYBA	FALSE
CYBB	CYBB	FALSE
CYC1	CYC1	FALSE
CYCS	CYCS	FALSE
CYFIP1	CYFIP1	FALSE
CYGB	CYGB	FALSE
CYP20A1	CYP20A1	FALSE
CYP27A1	CYP27A1	FALSE
CYP2S1	CYP2S1	FALSE
CYP2W1	CYP2W1	FALSE
CYP3A5	CYP3A5	FALSE
CYP4F3	CYP4F3	FALSE
CYP4X1	CYP4X1	FALSE
CYP51A1	CYP51A1	FALSE
CYTH2	CYTH2	FALSE
D2HGDH	D2HGDH	FALSE
DAB2	DAB2	FALSE
DAB2IP	DAB2IP	FALSE
DACH1	DACH1	FALSE
DAD1	DAD1	FALSE
DAG1	DAG1	FALSE
DAK	DAK	FALSE
DAP	DAP	FALSE
DAP3	DAP3	FALSE
DAPK3	DAPK3	FALSE
DARS	DARS	FALSE
DARS2	DARS2	FALSE
DAZAP1	DAZAP1	FALSE
DBI	DBI	FALSE
DBN1	DBN1	FALSE
DBNL	DBNL	FALSE
DBR1	DBR1	FALSE
DBT	DBT	FALSE
DCAF13	DCAF13	FALSE
DCAF7	DCAF7	FALSE
DCAF8	DCAF8	FALSE
DCAKD	DCAKD	FALSE
DCD	DCD	FALSE
DCK	DCK	FALSE
DCLK1	DCLK1	FALSE
DCN	DCN	FALSE
DCP1A	DCP1A	FALSE
DCPS	DCPS	FALSE
DCTD	DCTD	FALSE
DCTN1	DCTN1	FALSE
DCTN2	DCTN2	FALSE
DCTN3	DCTN3	FALSE
DCTN4	DCTN4	FALSE
DCTN5	DCTN5	FALSE
DCTN6	DCTN6	FALSE
DCTPP1	DCTPP1	FALSE
DCUN1D1	DCUN1D1	FALSE
DCXR	DCXR	FALSE
DDA1	DDA1	FALSE
DDAH1	DDAH1	FALSE
DDAH2	DDAH2	FALSE
DDB1	DDB1	FALSE
DDB2	DDB2	FALSE
DDC	DDC	FALSE
DDI2	DDI2	FALSE
DDOST	DDOST	FALSE
DDRGK1	DDRGK1	FALSE
DDT	DDT	FALSE
DDX1	DDX1	FALSE
DDX10	DDX10	FALSE
DDX17	DDX17	FALSE
DDX18	DDX18	FALSE
DDX19A	DDX19A	FALSE
DDX20	DDX20	FALSE
DDX21	DDX21	FALSE
DDX23	DDX23	FALSE
DDX24	DDX24	FALSE
DDX27	DDX27	FALSE
DDX28	DDX28	FALSE
DDX31	DDX31	FALSE
DDX39A	DDX39A	FALSE
DDX39B	DDX39B	FALSE
DDX3X	DDX3X	FALSE
DDX41	DDX41	FALSE
DDX42	DDX42	FALSE
DDX46	DDX46	FALSE
DDX47	DDX47	FALSE
DDX49	DDX49	FALSE
DDX5	DDX5	FALSE
DDX50	DDX50	FALSE
DDX51	DDX51	FALSE
DDX52	DDX52	FALSE
DDX54	DDX54	FALSE
DDX56	DDX56	FALSE
DDX58	DDX58	FALSE
DDX6	DDX6	FALSE
DDX60	DDX60	FALSE
DECR1	DECR1	FALSE
DECR2	DECR2	FALSE
DEF6	DEF6	FALSE
DEFA1	DEFA1	FALSE
DEFA5	DEFA5	FALSE
DEFA6	DEFA6	FALSE
DEK	DEK	FALSE
DENND2D	DENND2D	FALSE
DENND4C	DENND4C	FALSE
DENR	DENR	FALSE
DERA	DERA	FALSE
DERL1	DERL1	FALSE
DES	DES	FALSE
DFFA	DFFA	FALSE
DFFB	DFFB	FALSE
DGAT1	DGAT1	FALSE
DGKA	DGKA	FALSE
DHCR24	DHCR24	FALSE
DHCR7	DHCR7	FALSE
DHFR	DHFR	FALSE
DHODH	DHODH	FALSE
DHPS	DHPS	FALSE
DHRS1	DHRS1	FALSE
DHRS11	DHRS11	FALSE
DHRS3	DHRS3	FALSE
DHRS4	DHRS4	FALSE
DHRS7	DHRS7	FALSE
DHRS7B	DHRS7B	FALSE
DHRSX	DHRSX	FALSE
DHX15	DHX15	FALSE
DHX16	DHX16	FALSE
DHX29	DHX29	FALSE
DHX30	DHX30	FALSE
DHX36	DHX36	FALSE
DHX37	DHX37	FALSE
DHX38	DHX38	FALSE
DHX40	DHX40	FALSE
DHX8	DHX8	FALSE
DHX9	DHX9	FALSE
DIABLO	DIABLO	FALSE
DIAPH1	DIAPH1	FALSE
DIAPH2	DIAPH2	FALSE
DIAPH3	DIAPH3	FALSE
DIDO1	DIDO1	FALSE
DIEXF	DIEXF	FALSE
DIMT1	DIMT1	FALSE
DIP2B	DIP2B	FALSE
DIS3	DIS3	FALSE
DKC1	DKC1	FALSE
DLAT	DLAT	FALSE
DLD	DLD	FALSE
DLG1	DLG1	FALSE
DLG3	DLG3	FALSE
DLGAP4	DLGAP4	FALSE
DLST	DLST	FALSE
DMBT1	DMBT1	FALSE
DMD	DMD	FALSE
DMXL2	DMXL2	FALSE
DNAH8	DNAH8	FALSE
DNAJA1	DNAJA1	FALSE
DNAJA2	DNAJA2	FALSE
DNAJA3	DNAJA3	FALSE
DNAJA4	DNAJA4	FALSE
DNAJB1	DNAJB1	FALSE
DNAJB11	DNAJB11	FALSE
DNAJB12	DNAJB12	FALSE
DNAJB2	DNAJB2	FALSE
DNAJB4	DNAJB4	FALSE
DNAJB5	DNAJB5	FALSE
DNAJB6	DNAJB6	FALSE
DNAJC1	DNAJC1	FALSE
DNAJC10	DNAJC10	FALSE
DNAJC11	DNAJC11	FALSE
DNAJC13	DNAJC13	FALSE
DNAJC15	DNAJC15	FALSE
DNAJC17	DNAJC17	FALSE
DNAJC19	DNAJC19	FALSE
DNAJC2	DNAJC2	FALSE
DNAJC21	DNAJC21	FALSE
DNAJC25	DNAJC25	FALSE
DNAJC3	DNAJC3	FALSE
DNAJC5	DNAJC5	FALSE
DNAJC7	DNAJC7	FALSE
DNAJC8	DNAJC8	FALSE
DNAJC9	DNAJC9	FALSE
DNASE1	DNASE1	FALSE
DNASE2	DNASE2	FALSE
DNM1	DNM1	FALSE
DNM1L	DNM1L	FALSE
DNM2	DNM2	FALSE
DNM3	DNM3	FALSE
DNMT1	DNMT1	FALSE
DNPEP	DNPEP	FALSE
DNPH1	DNPH1	FALSE
DNTTIP1	DNTTIP1	FALSE
DNTTIP2	DNTTIP2	FALSE
DOCK1	DOCK1	FALSE
DOCK10	DOCK10	FALSE
DOCK11	DOCK11	FALSE
DOCK2	DOCK2	FALSE
DOCK5	DOCK5	FALSE
DOCK6	DOCK6	FALSE
DOCK7	DOCK7	FALSE
DOCK8	DOCK8	FALSE
DOCK9	DOCK9	FALSE
DOHH	DOHH	FALSE
DOK2	DOK2	FALSE
DOK3	DOK3	FALSE
DOLPP1	DOLPP1	FALSE
DOPEY2	DOPEY2	FALSE
DPCD	DPCD	FALSE
DPEP1	DPEP1	FALSE
DPF2	DPF2	FALSE
DPH2	DPH2	FALSE
DPM1	DPM1	FALSE
DPM3	DPM3	FALSE
DPP3	DPP3	FALSE
DPP4	DPP4	FALSE
DPP7	DPP7	FALSE
DPP9	DPP9	FALSE
DPT	DPT	FALSE
DPY19L1	DPY19L1	FALSE
DPY30	DPY30	FALSE
DPYSL2	DPYSL2	FALSE
DPYSL3	DPYSL3	FALSE
DRAP1	DRAP1	FALSE
DRG1	DRG1	FALSE
DRG2	DRG2	FALSE
DSC2	DSC2	FALSE
DSC3	DSC3	FALSE
DSCR3	DSCR3	FALSE
DSEL	DSEL	FALSE
DSG2	DSG2	FALSE
DSG3	DSG3	FALSE
DSP	DSP	FALSE
DST	DST	FALSE
DSTN	DSTN	FALSE
DTNA	DTNA	FALSE
DTNBP1	DTNBP1	FALSE
DTX2	DTX2	FALSE
DTX3L	DTX3L	FALSE
DTYMK	DTYMK	FALSE
DUOX2	DUOX2	FALSE
DUS3L	DUS3L	FALSE
DUSP12	DUSP12	FALSE
DUSP23	DUSP23	FALSE
DUSP3	DUSP3	FALSE
DUT	DUT	FALSE
DYM	DYM	FALSE
DYNC1H1	DYNC1H1	FALSE
DYNC1I2	DYNC1I2	FALSE
DYNC1LI1	DYNC1LI1	FALSE
DYNC1LI2	DYNC1LI2	FALSE
DYNLL1	DYNLL1	FALSE
DYNLL2	DYNLL2	FALSE
DYNLRB1	DYNLRB1	FALSE
DYNLT1	DYNLT1	FALSE
DYNLT3	DYNLT3	FALSE
DYSF	DYSF	FALSE
E2F4	E2F4	FALSE
EARS2	EARS2	FALSE
EBNA1BP2	EBNA1BP2	FALSE
EBP	EBP	FALSE
ECE1	ECE1	FALSE
ECH1	ECH1	FALSE
ECHDC1	ECHDC1	FALSE
ECHDC3	ECHDC3	FALSE
ECHS1	ECHS1	FALSE
ECI1	ECI1	FALSE
ECI2	ECI2	FALSE
ECM1	ECM1	FALSE
ECSIT	ECSIT	FALSE
EDC3	EDC3	FALSE
EDC4	EDC4	FALSE
EDEM3	EDEM3	FALSE
EDF1	EDF1	FALSE
EDIL3	EDIL3	FALSE
EEA1	EEA1	FALSE
EED	EED	FALSE
EEF1A1	EEF1A1	FALSE
EEF1B2	EEF1B2	FALSE
EEF1D	EEF1D	FALSE
EEF1E1	EEF1E1	FALSE
EEF1G	EEF1G	FALSE
EEF2	EEF2	FALSE
EEFSEC	EEFSEC	FALSE
EFCAB14	EFCAB14	FALSE
EFEMP1	EFEMP1	FALSE
EFEMP2	EFEMP2	FALSE
EFHD2	EFHD2	FALSE
EFNB1	EFNB1	FALSE
EFR3A	EFR3A	FALSE
EFTUD1	EFTUD1	FALSE
EFTUD2	EFTUD2	FALSE
EGFR	EGFR	FALSE
EGLN1	EGLN1	FALSE
EHBP1	EHBP1	FALSE
EHBP1L1	EHBP1L1	FALSE
EHD1	EHD1	FALSE
EHD2	EHD2	FALSE
EHD3	EHD3	FALSE
EHD4	EHD4	FALSE
EHHADH	EHHADH	FALSE
EIF1	EIF1	FALSE
EIF1AX	EIF1AX	FALSE
EIF2A	EIF2A	FALSE
EIF2AK2	EIF2AK2	FALSE
EIF2B1	EIF2B1	FALSE
EIF2B2	EIF2B2	FALSE
EIF2B3	EIF2B3	FALSE
EIF2B4	EIF2B4	FALSE
EIF2B5	EIF2B5	FALSE
EIF2D	EIF2D	FALSE
EIF2S1	EIF2S1	FALSE
EIF2S2	EIF2S2	FALSE
EIF2S3	EIF2S3	FALSE
EIF3A	EIF3A	FALSE
EIF3B	EIF3B	FALSE
EIF3C	EIF3C	FALSE
EIF3D	EIF3D	FALSE
EIF3E	EIF3E	FALSE
EIF3F	EIF3F	FALSE
EIF3G	EIF3G	FALSE
EIF3H	EIF3H	FALSE
EIF3I	EIF3I	FALSE
EIF3J	EIF3J	FALSE
EIF3K	EIF3K	FALSE
EIF3L	EIF3L	FALSE
EIF3M	EIF3M	FALSE
EIF4A1	EIF4A1	FALSE
EIF4A2	EIF4A2	FALSE
EIF4A3	EIF4A3	FALSE
EIF4B	EIF4B	FALSE
EIF4E	EIF4E	FALSE
EIF4E2	EIF4E2	FALSE
EIF4EBP2	EIF4EBP2	FALSE
EIF4G1	EIF4G1	FALSE
EIF4G2	EIF4G2	FALSE
EIF4G3	EIF4G3	FALSE
EIF4H	EIF4H	FALSE
EIF5	EIF5	FALSE
EIF5A	EIF5A	FALSE
EIF5B	EIF5B	FALSE
EIF6	EIF6	FALSE
ELAC2	ELAC2	FALSE
ELANE	ELANE	FALSE
ELAVL1	ELAVL1	FALSE
ELF1	ELF1	FALSE
ELMO1	ELMO1	FALSE
ELMO3	ELMO3	FALSE
ELMOD2	ELMOD2	FALSE
ELN	ELN	FALSE
ELOVL1	ELOVL1	FALSE
ELP2	ELP2	FALSE
ELP3	ELP3	FALSE
ELP4	ELP4	FALSE
EMC1	EMC1	FALSE
EMC10	EMC10	FALSE
EMC2	EMC2	FALSE
EMC3	EMC3	FALSE
EMC4	EMC4	FALSE
EMC7	EMC7	FALSE
EMC8	EMC8	FALSE
EMD	EMD	FALSE
EMG1	EMG1	FALSE
EMILIN1	EMILIN1	FALSE
EMILIN2	EMILIN2	FALSE
EML1	EML1	FALSE
EML2	EML2	FALSE
EML4	EML4	FALSE
ENAH	ENAH	FALSE
ENDOD1	ENDOD1	FALSE
ENDOG	ENDOG	FALSE
ENG	ENG	FALSE
ENGASE	ENGASE	FALSE
ENO1	ENO1	FALSE
ENO2	ENO2	FALSE
ENOPH1	ENOPH1	FALSE
ENOSF1	ENOSF1	FALSE
ENPP1	ENPP1	FALSE
ENPP4	ENPP4	FALSE
ENSA	ENSA	FALSE
ENTPD5	ENTPD5	FALSE
ENTPD6	ENTPD6	FALSE
ENTPD8	ENTPD8	FALSE
EOGT	EOGT	FALSE
EP400	EP400	FALSE
EPB41	EPB41	FALSE
EPB41L1	EPB41L1	FALSE
EPB41L2	EPB41L2	FALSE
EPB41L3	EPB41L3	FALSE
EPB41L4B	EPB41L4B	FALSE
EPB41L5	EPB41L5	FALSE
EPB42	EPB42	FALSE
EPCAM	EPCAM	FALSE
EPDR1	EPDR1	FALSE
EPHA2	EPHA2	FALSE
EPHB2	EPHB2	FALSE
EPHB3	EPHB3	FALSE
EPHB4	EPHB4	FALSE
EPHX1	EPHX1	FALSE
EPHX2	EPHX2	FALSE
EPM2AIP1	EPM2AIP1	FALSE
EPN1	EPN1	FALSE
EPN2	EPN2	FALSE
EPPK1	EPPK1	FALSE
EPRS	EPRS	FALSE
EPS15	EPS15	FALSE
EPS15L1	EPS15L1	FALSE
EPS8	EPS8	FALSE
EPS8L1	EPS8L1	FALSE
EPS8L2	EPS8L2	FALSE
EPS8L3	EPS8L3	FALSE
EPX	EPX	FALSE
ERAL1	ERAL1	FALSE
ERAP1	ERAP1	FALSE
ERAP2	ERAP2	FALSE
ERBB2	ERBB2	FALSE
ERBB2IP	ERBB2IP	FALSE
ERC1	ERC1	FALSE
ERCC2	ERCC2	FALSE
ERCC3	ERCC3	FALSE
ERCC6	ERCC6	FALSE
ERGIC1	ERGIC1	FALSE
ERGIC2	ERGIC2	FALSE
ERGIC3	ERGIC3	FALSE
ERH	ERH	FALSE
ERI1	ERI1	FALSE
ERLEC1	ERLEC1	FALSE
ERLIN1	ERLIN1	FALSE
ERLIN2	ERLIN2	FALSE
ERMP1	ERMP1	FALSE
ERN2	ERN2	FALSE
ERO1L	ERO1L	FALSE
ERP29	ERP29	FALSE
ERP44	ERP44	FALSE
ESD	ESD	FALSE
ESRP1	ESRP1	FALSE
ESRP2	ESRP2	FALSE
ESRRA	ESRRA	FALSE
ESYT1	ESYT1	FALSE
ESYT2	ESYT2	FALSE
ETF1	ETF1	FALSE
ETFA	ETFA	FALSE
ETFB	ETFB	FALSE
ETFDH	ETFDH	FALSE
ETHE1	ETHE1	FALSE
EVI2B	EVI2B	FALSE
EVL	EVL	FALSE
EVPL	EVPL	FALSE
EWSR1	EWSR1	FALSE
EXD2	EXD2	FALSE
EXOC1	EXOC1	FALSE
EXOC2	EXOC2	FALSE
EXOC3	EXOC3	FALSE
EXOC4	EXOC4	FALSE
EXOC5	EXOC5	FALSE
EXOC6	EXOC6	FALSE
EXOC6B	EXOC6B	FALSE
EXOC7	EXOC7	FALSE
EXOC8	EXOC8	FALSE
EXOSC1	EXOSC1	FALSE
EXOSC10	EXOSC10	FALSE
EXOSC2	EXOSC2	FALSE
EXOSC3	EXOSC3	FALSE
EXOSC4	EXOSC4	FALSE
EXOSC5	EXOSC5	FALSE
EXOSC6	EXOSC6	FALSE
EXOSC7	EXOSC7	FALSE
EXOSC8	EXOSC8	FALSE
EXOSC9	EXOSC9	FALSE
EZH2	EZH2	FALSE
EZR	EZR	FALSE
F11R	F11R	FALSE
F12	F12	FALSE
F13A1	F13A1	FALSE
F2	F2	FALSE
F5	F5	FALSE
F9	F9	FALSE
FAAH	FAAH	FALSE
FABP1	FABP1	FALSE
FABP2	FABP2	FALSE
FABP3	FABP3	FALSE
FABP4	FABP4	FALSE
FABP5	FABP5	FALSE
FABP6	FABP6	FALSE
FAF1	FAF1	FALSE
FAF2	FAF2	FALSE
FAH	FAH	FALSE
FAHD1	FAHD1	FALSE
FAHD2A	FAHD2A	FALSE
FAM105A	FAM105A	FALSE
FAM114A1	FAM114A1	FALSE
FAM114A2	FAM114A2	FALSE
FAM118B	FAM118B	FALSE
FAM120A	FAM120A	FALSE
FAM120B	FAM120B	FALSE
FAM129A	FAM129A	FALSE
FAM129B	FAM129B	FALSE
FAM134C	FAM134C	FALSE
FAM136A	FAM136A	FALSE
FAM160B1	FAM160B1	FALSE
FAM160B2	FAM160B2	FALSE
FAM162A	FAM162A	FALSE
FAM175B	FAM175B	FALSE
FAM177A1	FAM177A1	FALSE
FAM185A	FAM185A	FALSE
FAM192A	FAM192A	FALSE
FAM195B	FAM195B	FALSE
FAM203A	FAM203A	FALSE
FAM207A	FAM207A	FALSE
FAM208A	FAM208A	FALSE
FAM210A	FAM210A	FALSE
FAM213A	FAM213A	FALSE
FAM213B	FAM213B	FALSE
FAM21A	FAM21A	FALSE
FAM3B	FAM3B	FALSE
FAM3C	FAM3C	FALSE
FAM3D	FAM3D	FALSE
FAM45A	FAM45A	FALSE
FAM49A	FAM49A	FALSE
FAM49B	FAM49B	FALSE
FAM50A	FAM50A	FALSE
FAM83B	FAM83B	FALSE
FAM83E	FAM83E	FALSE
FAM83H	FAM83H	FALSE
FAM84A	FAM84A	FALSE
FAM84B	FAM84B	FALSE
FAM91A1	FAM91A1	FALSE
FAM96A	FAM96A	FALSE
FAM96B	FAM96B	FALSE
FAM98A	FAM98A	FALSE
FAM98B	FAM98B	FALSE
FAM98C	FAM98C	FALSE
FANCD2	FANCD2	FALSE
FANCI	FANCI	FALSE
FANCM	FANCM	FALSE
FAP	FAP	FALSE
FAR1	FAR1	FALSE
FAR2	FAR2	FALSE
FARP1	FARP1	FALSE
FARP2	FARP2	FALSE
FARSA	FARSA	FALSE
FARSB	FARSB	FALSE
FAS	FAS	FALSE
FASN	FASN	FALSE
FASTKD1	FASTKD1	FALSE
FASTKD2	FASTKD2	FALSE
FASTKD5	FASTKD5	FALSE
FAT1	FAT1	FALSE
FAU	FAU	FALSE
FBL	FBL	FALSE
FBLIM1	FBLIM1	FALSE
FBLN1	FBLN1	FALSE
FBLN2	FBLN2	FALSE
FBLN5	FBLN5	FALSE
FBN1	FBN1	FALSE
FBN2	FBN2	FALSE
FBP1	FBP1	FALSE
FBXL8	FBXL8	FALSE
FBXO2	FBXO2	FALSE
FBXO22	FBXO22	FALSE
FBXO6	FBXO6	FALSE
FBXO7	FBXO7	FALSE
FBXW11	FBXW11	FALSE
FCGBP	FCGBP	FALSE
FCGR2A	FCGR2A	FALSE
FCGR3B	FCGR3B	FALSE
FCGRT	FCGRT	FALSE
FCHO2	FCHO2	FALSE
FCN1	FCN1	FALSE
FDFT1	FDFT1	FALSE
FDPS	FDPS	FALSE
FDX1	FDX1	FALSE
FDXR	FDXR	FALSE
FECH	FECH	FALSE
FEN1	FEN1	FALSE
FERMT1	FERMT1	FALSE
FERMT2	FERMT2	FALSE
FERMT3	FERMT3	FALSE
FGA	FGA	FALSE
FGB	FGB	FALSE
FGD3	FGD3	FALSE
FGD4	FGD4	FALSE
FGFR1OP2	FGFR1OP2	FALSE
FGG	FGG	FALSE
FGL2	FGL2	FALSE
FGR	FGR	FALSE
FH	FH	FALSE
FHL1	FHL1	FALSE
FHL2	FHL2	FALSE
FHL3	FHL3	FALSE
FHOD1	FHOD1	FALSE
FIBP	FIBP	FALSE
FILIP1L	FILIP1L	FALSE
FIP1L1	FIP1L1	FALSE
FIS1	FIS1	FALSE
FITM2	FITM2	FALSE
FKBP10	FKBP10	FALSE
FKBP11	FKBP11	FALSE
FKBP15	FKBP15	FALSE
FKBP1A	FKBP1A	FALSE
FKBP2	FKBP2	FALSE
FKBP3	FKBP3	FALSE
FKBP4	FKBP4	FALSE
FKBP5	FKBP5	FALSE
FKBP8	FKBP8	FALSE
FKBP9	FKBP9	FALSE
FLAD1	FLAD1	FALSE
FLII	FLII	FALSE
FLNA	FLNA	FALSE
FLNB	FLNB	FALSE
FLNC	FLNC	FALSE
FLOT1	FLOT1	FALSE
FLOT2	FLOT2	FALSE
FMNL1	FMNL1	FALSE
FMNL3	FMNL3	FALSE
FMO5	FMO5	FALSE
FMOD	FMOD	FALSE
FMR1	FMR1	FALSE
FN1	FN1	FALSE
FN3K	FN3K	FALSE
FN3KRP	FN3KRP	FALSE
FNBP1	FNBP1	FALSE
FNBP1L	FNBP1L	FALSE
FNBP4	FNBP4	FALSE
FNDC3A	FNDC3A	FALSE
FNDC3B	FNDC3B	FALSE
FNTA	FNTA	FALSE
FOCAD	FOCAD	FALSE
FOLR2	FOLR2	FALSE
FOXK1	FOXK1	FALSE
FOXRED1	FOXRED1	FALSE
FRG1	FRG1	FALSE
FRMD8	FRMD8	FALSE
FRYL	FRYL	FALSE
FSCN1	FSCN1	FALSE
FSTL1	FSTL1	FALSE
FTH1	FTH1	FALSE
FTL	FTL	FALSE
FTO	FTO	FALSE
FTSJ3	FTSJ3	FALSE
FUBP1	FUBP1	FALSE
FUBP3	FUBP3	FALSE
FUCA1	FUCA1	FALSE
FUCA2	FUCA2	FALSE
FUK	FUK	FALSE
FUNDC2	FUNDC2	FALSE
FUS	FUS	FALSE
FUT3	FUT3	FALSE
FUT8	FUT8	FALSE
FXN	FXN	FALSE
FXR1	FXR1	FALSE
FXR2	FXR2	FALSE
FXYD3	FXYD3	FALSE
FYCO1	FYCO1	FALSE
FYTTD1	FYTTD1	FALSE
G3BP1	G3BP1	FALSE
G3BP2	G3BP2	FALSE
G6PD	G6PD	FALSE
GAA	GAA	FALSE
GABARAPL2	GABARAPL2	FALSE
GABPA	GABPA	FALSE
GADD45GIP1	GADD45GIP1	FALSE
GAK	GAK	FALSE
GAL3ST2	GAL3ST2	FALSE
GALC	GALC	FALSE
GALE	GALE	FALSE
GALK1	GALK1	FALSE
GALK2	GALK2	FALSE
GALM	GALM	FALSE
GALNT1	GALNT1	FALSE
GALNT12	GALNT12	FALSE
GALNT2	GALNT2	FALSE
GALNT3	GALNT3	FALSE
GALNT4	GALNT4	FALSE
GALNT5	GALNT5	FALSE
GALNT6	GALNT6	FALSE
GALNT7	GALNT7	FALSE
GANAB	GANAB	FALSE
GAPDH	GAPDH	FALSE
GAPVD1	GAPVD1	FALSE
GAR1	GAR1	FALSE
GARS	GARS	FALSE
GART	GART	FALSE
GATAD2A	GATAD2A	FALSE
GATAD2B	GATAD2B	FALSE
GATM	GATM	FALSE
GBA	GBA	FALSE
GBAS	GBAS	FALSE
GBE1	GBE1	FALSE
GBF1	GBF1	FALSE
GBP1	GBP1	FALSE
GBP2	GBP2	FALSE
GBP4	GBP4	FALSE
GBP5	GBP5	FALSE
GC	GC	FALSE
GCA	GCA	FALSE
GCC1	GCC1	FALSE
GCC2	GCC2	FALSE
GCDH	GCDH	FALSE
GCFC2	GCFC2	FALSE
GCG	GCG	FALSE
GCHFR	GCHFR	FALSE
GCLC	GCLC	FALSE
GCLM	GCLM	FALSE
GCN1L1	GCN1L1	FALSE
GCNT3	GCNT3	FALSE
GCSH	GCSH	FALSE
GDA	GDA	FALSE
GDAP1	GDAP1	FALSE
GDF15	GDF15	FALSE
GDI1	GDI1	FALSE
GDI2	GDI2	FALSE
GDPD3	GDPD3	FALSE
GEMIN2	GEMIN2	FALSE
GEMIN4	GEMIN4	FALSE
GEMIN5	GEMIN5	FALSE
GET4	GET4	FALSE
GFER	GFER	FALSE
GFM1	GFM1	FALSE
GFM2	GFM2	FALSE
GFPT1	GFPT1	FALSE
GFPT2	GFPT2	FALSE
GGA1	GGA1	FALSE
GGA2	GGA2	FALSE
GGCT	GGCT	FALSE
GGCX	GGCX	FALSE
GGH	GGH	FALSE
GGPS1	GGPS1	FALSE
GGT1	GGT1	FALSE
GGT5	GGT5	FALSE
GHDC	GHDC	FALSE
GHITM	GHITM	FALSE
GID8	GID8	FALSE
GIGYF2	GIGYF2	FALSE
GIMAP1	GIMAP1	FALSE
GIMAP2	GIMAP2	FALSE
GIMAP4	GIMAP4	FALSE
GIMAP7	GIMAP7	FALSE
GINS3	GINS3	FALSE
GIPC1	GIPC1	FALSE
GIPC2	GIPC2	FALSE
GIT1	GIT1	FALSE
GIT2	GIT2	FALSE
GK	GK	FALSE
GLA	GLA	FALSE
GLB1	GLB1	FALSE
GLCE	GLCE	FALSE
GLDC	GLDC	FALSE
GLG1	GLG1	FALSE
GLIPR2	GLIPR2	FALSE
GLMN	GLMN	FALSE
GLO1	GLO1	FALSE
GLOD4	GLOD4	FALSE
GLRX	GLRX	FALSE
GLRX3	GLRX3	FALSE
GLRX5	GLRX5	FALSE
GLS	GLS	FALSE
GLTP	GLTP	FALSE
GLTPD1	GLTPD1	FALSE
GLUD1	GLUD1	FALSE
GLUL	GLUL	FALSE
GLYR1	GLYR1	FALSE
GM2A	GM2A	FALSE
GMDS	GMDS	FALSE
GMEB1	GMEB1	FALSE
GMFB	GMFB	FALSE
GMFG	GMFG	FALSE
GMIP	GMIP	FALSE
GMPPA	GMPPA	FALSE
GMPPB	GMPPB	FALSE
GMPR	GMPR	FALSE
GMPR2	GMPR2	FALSE
GMPS	GMPS	FALSE
GNA11	GNA11	FALSE
GNA13	GNA13	FALSE
GNAI1	GNAI1	FALSE
GNAI2	GNAI2	FALSE
GNAI3	GNAI3	FALSE
GNAO1	GNAO1	FALSE
GNAQ	GNAQ	FALSE
GNAS	GNAS	FALSE
GNB1	GNB1	FALSE
GNB1L	GNB1L	FALSE
GNB2	GNB2	FALSE
GNB2L1	GNB2L1	FALSE
GNB4	GNB4	FALSE
GNE	GNE	FALSE
GNG12	GNG12	FALSE
GNG5	GNG5	FALSE
GNL1	GNL1	FALSE
GNL2	GNL2	FALSE
GNL3	GNL3	FALSE
GNL3L	GNL3L	FALSE
GNPAT	GNPAT	FALSE
GNPDA1	GNPDA1	FALSE
GNPNAT1	GNPNAT1	FALSE
GNS	GNS	FALSE
GOLGA2	GOLGA2	FALSE
GOLGA3	GOLGA3	FALSE
GOLGA4	GOLGA4	FALSE
GOLGA5	GOLGA5	FALSE
GOLGB1	GOLGB1	FALSE
GOLIM4	GOLIM4	FALSE
GOLM1	GOLM1	FALSE
GOLPH3	GOLPH3	FALSE
GOLPH3L	GOLPH3L	FALSE
GOLT1B	GOLT1B	FALSE
GOPC	GOPC	FALSE
GORAB	GORAB	FALSE
GORASP2	GORASP2	FALSE
GOSR1	GOSR1	FALSE
GOSR2	GOSR2	FALSE
GOT1	GOT1	FALSE
GOT2	GOT2	FALSE
GP1BB	GP1BB	FALSE
GP2	GP2	FALSE
GPA33	GPA33	FALSE
GPAA1	GPAA1	FALSE
[truncated: 3,540 more rows]
